# Supplementary material for: Loss of interleukin-1 beta is not protective in the lupus-prone NZM2328 mouse model
Source: PubMed Central journal article supplement (PMC10227599; doi:10.3389/fimmu.2023.1162799), 2023-05-16
Supplement: DataSheet_1.pdf [file DataSheet_1.pdf]

## *Supplementary Material*

### **Loss of interleukin-1 beta is not protective in the lupus-prone NZM2328 mouse model**

**Shannon N. Loftus<sup>1,2</sup>, Jianhua Liu<sup>1</sup>, Celine C. Berthier<sup>3</sup>, Johann E. Gudjonsson<sup>4</sup>, Mehrnaz Gharaee-Kermani<sup>1,4</sup>, Lam C. Tsoi<sup>4,5,6</sup>, J. Michelle Kahlenberg<sup>1,4</sup>**

<sup>1</sup>Division of Rheumatology, Department of Internal Medicine, University of Michigan, Ann Arbor, MI, 48109

<sup>2</sup>Graduate Program in Immunology, University of Michigan, Ann Arbor, MI 48109

<sup>3</sup>Division of Nephrology, Department of Internal Medicine, University of Michigan, Ann Arbor, MI 48109

<sup>4</sup>Department of Dermatology, University of Michigan, Ann Arbor, MI 48109

<sup>5</sup>Department of Computational Medicine and Bioinformatics, University of Michigan, Ann Arbor, MI 48109

<sup>6</sup>Department of Biostatistics, University of Michigan, Ann Arbor, MI 48109

**\* Correspondence:**

J. Michelle Kahlenberg

[mkahlenb@med.umich.edu](mailto:mkahlenb@med.umich.edu)

#### **1 Supplementary Figures and Tables**

##### **1.1 Supplementary Figures**

Supplementary Figure 1

Supplementary Figure 2

Supplementary Figure 3

##### **1.2 Supplementary Tables**

Supplementary Table 1

Supplementary Table 2

A.

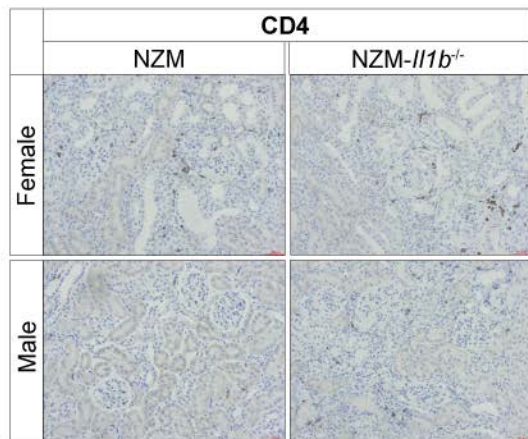

B.

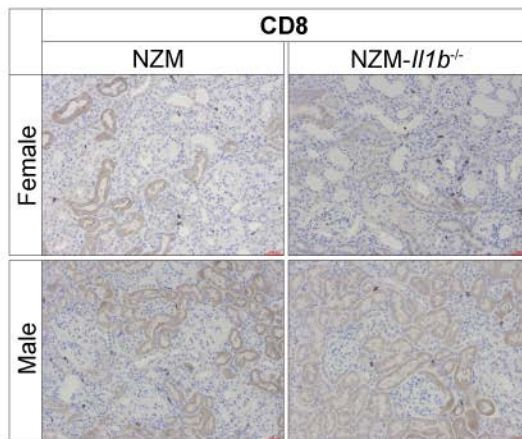

C.

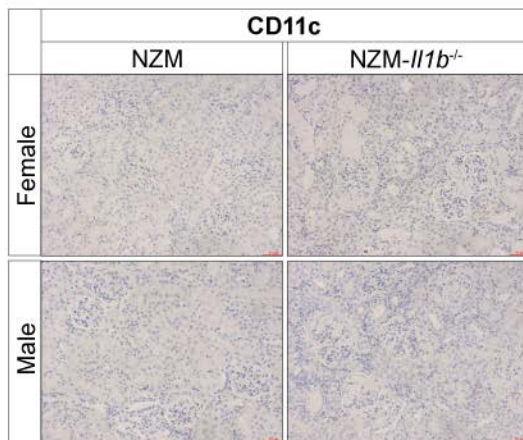

**Supplementary Figure 1.** Representative images of kidneys stained with (A) CD4, (B) CD8, and (C) CD11c.

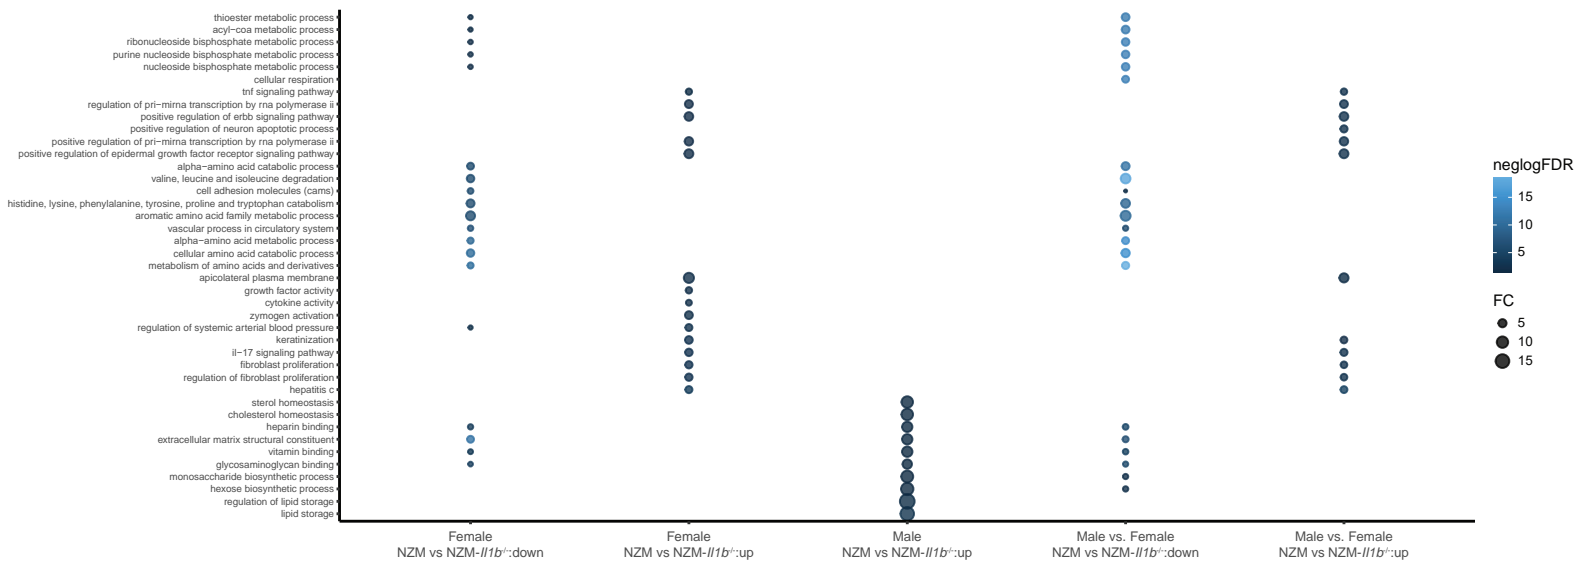

**Supplementary Figure 2.** Pathway analysis of differentially expressed genes between NZM and NZM-*Il1b*<sup>-/-</sup> kidneys highlighted the TNF ( $p=7.59 \times 10^{-5}$ ) and IL-17 signaling ( $p=1.21 \times 10^{-6}$ ) pathways among the top regulated pathways.

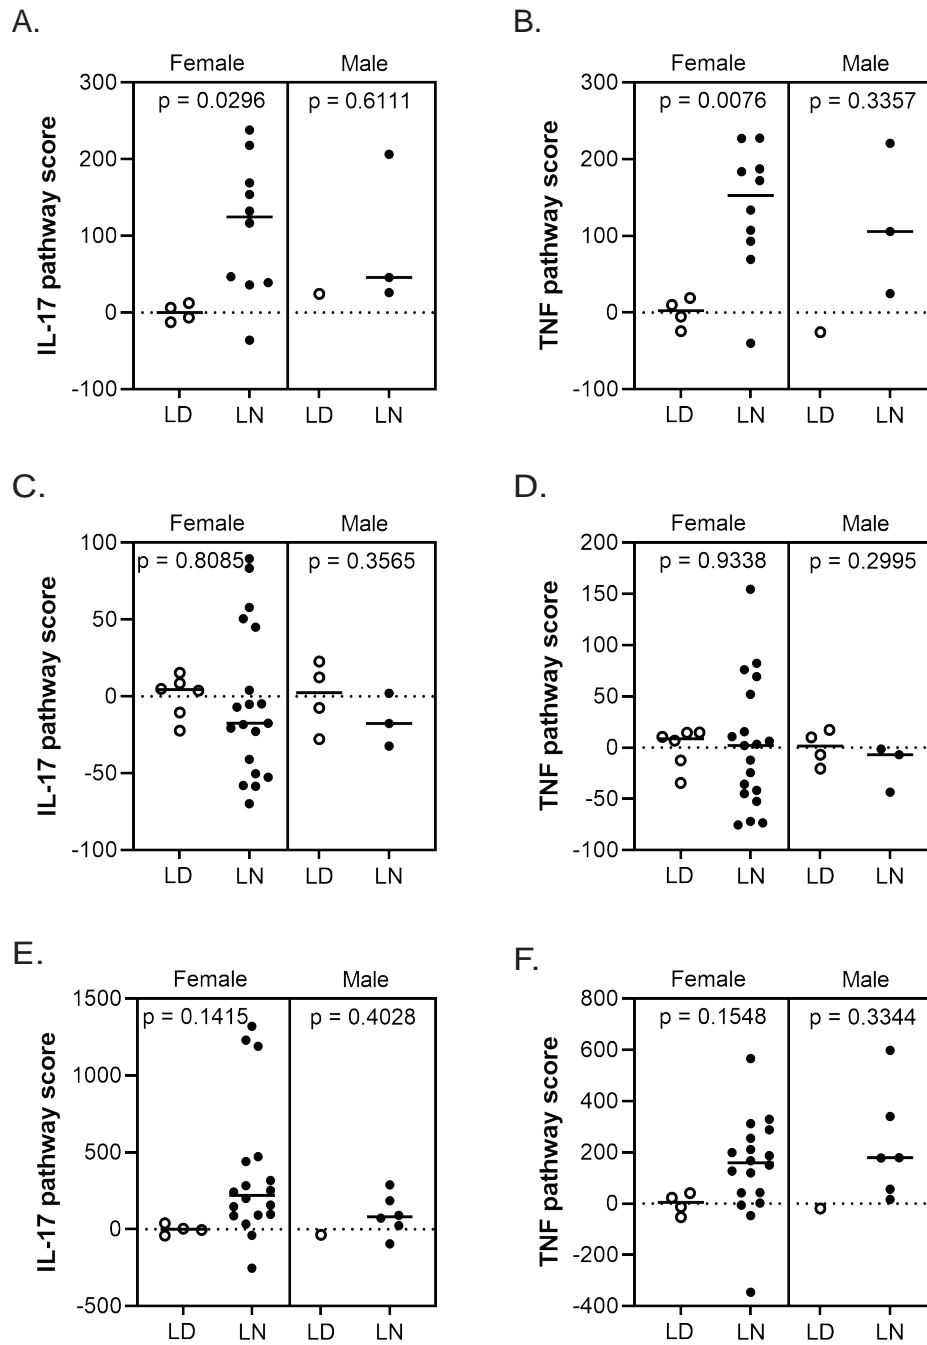

**Supplementary Figure 3.** RNA-sequencing gene expression analysis of (A) IL-17 and (B) TNF pathway scores in the glomerular compartment of human lupus nephritis (LN) and healthy living donor (LD) biopsies: IL-17 and TNF signaling pathway scores were significantly higher in female LN (n=10) compared to LD controls (n=4) (p=0.0296 and 0.0076 respectively), but not in males (n=1 LD and 3 LN) (p=0.6111 and 0.3357 respectively). Microarray gene expression analysis of (C) IL-17 and (D) TNF pathway scores in the tubulointerstitial compartment of human LN and LD biopsies: IL-17 and TNF signaling pathway scores were not significantly different in female LN (n=19) compared to LD controls (n=6) (0.8085 and 0.9338, respectively) or in males (n=4 LD and n=3 LN) (p=0.3565 and 0.2995, respectively). RNA-sequencing gene expression analysis of (E) IL-17 and (F) TNF pathway scores in the tubulointerstitial compartment of human LN and LD biopsies: IL-17 and TNF signaling pathway scores were not significantly different in female LN (n=18) compared to LD controls (n=4) (p=0.1415 and 0.1548, respectively) or in males (n=1 LD and 6 LN) (p=0.4028 and 0.3344, respectively).
