# Supplementary material for: Loss of interleukin-1 beta is not protective in the lupus-prone NZM2328 mouse model
Source: PubMed Central journal article supplement (PMC10227599; doi:10.3389/fimmu.2023.1162799), 2023-05-16
Supplement: Table_2.pdf [file Table_2.pdf]

**Table S2:** Clinical characteristics of reference biopsies analyzed by Affymetrix microarray gene expression profiling. All patients are Caucasian. Data are presented as mean  $\pm$  SEM. NA: non available. \* Reference: Levey AS et al. A new equation to estimate glomerular filtration rate. Ann Intern Med. 2009;150(9):604-12 (PMID: 19414839).

|                                | Characteristic                            | Living donors (LD) |                 | Lupus nephritis (LN) |                 |
|--------------------------------|-------------------------------------------|--------------------|-----------------|----------------------|-----------------|
|                                |                                           | female             | male            | female               | (LN) male       |
| Glomerular compartment         | Patient number                            | 4                  | 9               | 19                   | 3               |
|                                | Age (years)                               | 61.0 $\pm$ 3.2     | 48.4 $\pm$ 3.9  | 32.7 $\pm$ 2.3       | 43.9 $\pm$ 14.7 |
|                                | Serum creatinine (mg/dL)                  | NA                 | 1.1 $\pm$ 0.1   | 1.7 $\pm$ 0.2        | 3.0 $\pm$ 0.0   |
|                                | Proteinuria (g/day)                       | absent             | absent          | 3.9 $\pm$ 0.9        | 1.3 $\pm$ 0.5   |
|                                | CKD-Epi GFR (ml/min/1.73m <sup>2</sup> )* | NA                 | 79.0 $\pm$ 7.7  | 55.6 $\pm$ 7.7       | 73.0 $\pm$ 9.8  |
| Tubulointerstitial compartment | Patient number                            | 6                  | 4               | 19                   | 3               |
|                                | Age (years)                               | 59.2 $\pm$ 3.0     | 42.5 $\pm$ 6.2  | 32.7 $\pm$ 2.3       | 43.9 $\pm$ 14.7 |
|                                | Serum creatinine (mg/dL)                  | NA                 | 1.0 $\pm$ 0.1   | 1.7 $\pm$ 0.2        | 3.0 $\pm$ 0.0   |
|                                | Proteinuria (g/day)                       | absent             | absent          | 3.9 $\pm$ 0.9        | 1.3 $\pm$ 0.5   |
|                                | CKD-Epi GFR (ml/min/1.73m <sup>2</sup> )* | NA                 | 88.1 $\pm$ 12.4 | 55.6 $\pm$ 7.7       | 73.0 $\pm$ 9.8  |

**Table S3:** Clinical characteristics of reference biopsies analyzed by RNA-sequencing gene expression profiling. All patients are Caucasian. Data are presented as mean  $\pm$  SEM. NA: non available. \* Reference: Levey AS et al. A new equation to estimate glomerular filtration rate. Ann Intern Med. 2009;150(9):604-12 (PMID: 19414839).

|                                | Characteristic                            | Living donors (LD) |        | Lupus nephritis (LN) |                 |
|--------------------------------|-------------------------------------------|--------------------|--------|----------------------|-----------------|
|                                |                                           | female             | male   | female               | (LN) male       |
| Glomerular compartment         | Patient number                            | 4                  | 1      | 10                   | 3               |
|                                | Age (years)                               | 50.4 $\pm$ 4.6     | 30.6   | 32.8 $\pm$ 4.9       | 46.9 $\pm$ 14.3 |
|                                | Serum creatinine (mg/dL)                  | NA                 | NA     | 1.2 $\pm$ 0.2        | 1.0 $\pm$ 0.2   |
|                                | Proteinuria (g/day)                       | absent             | absent | 5.2 $\pm$ 1.9        | NA              |
|                                | CKD-Epi GFR (ml/min/1.73m <sup>2</sup> )* | NA                 | NA     | 69.4 $\pm$ 10.0      | 81.1 $\pm$ 15.7 |
| Tubulointerstitial compartment | Patient number                            | 4                  | 1      | 18                   | 6               |
|                                | Age (years)                               | 50.4 $\pm$ 4.6     | 30.6   | 37.1 $\pm$ 3.3       | 37.8 $\pm$ 8.1  |
|                                | Serum creatinine (mg/dL)                  | NA                 | NA     | 1.3 $\pm$ 0.2        | 1.2 $\pm$ 0.2   |
|                                | Proteinuria (g/day)                       | absent             | absent | 4 $\pm$ 1.1          | 3.4 $\pm$ 1.7   |
|                                | CKD-Epi GFR (ml/min/1.73m <sup>2</sup> )* | NA                 | NA     | 69.1 $\pm$ 8.9       | 81.3 $\pm$ 13.4 |
